# Supplementary material for: Near infrared-emitting carbon dots for the detection of glial fibrillary acidic protein (GFAP): a non-enzymatic approach for the early identification of stroke and glioblastoma
Source: Royal Society of Chemistry journal article supplement (doi:10.1039/d4ay02013h), 2025-01-01
Supplement: d4ay02013h1.pdf [file d4ay02013h1.pdf]

**-Supplementary Information-**

**Near Infrared-Emitting Carbon Dots for the Detection of Glial Fibrillary Acidic Protein (GFAP): A Non-Enzymatic Approach for the Early Identification of Stroke and Glioblastoma**

Susan Varghese<sup>1</sup>, Merin K. Abraham<sup>1</sup>, Ali Ibrahim Shkhair<sup>1</sup>, Geneva Indongo<sup>1</sup>, Greeshma Rajeevan<sup>1</sup>, Arathy B. K<sup>1</sup>, Anju S. Madanan<sup>1</sup>, Dr. Sony George<sup>2##\*</sup>

<sup>1</sup>Department of Chemistry, School of Physical and Mathematical Sciences, University of Kerala, Kariavattom campus, Thiruvananthapuram-695581, Kerala, India.

<sup>2</sup>Associate Professor, Department of Chemistry, School of Physical and Mathematical Sciences, University of Kerala, Kariavattom campus, Thiruvananthapuram-695581, Kerala, India.

#Coordinator, International Inter University Centre for Sensing and Imaging (IIUCSI), Department of Chemistry, University of Kerala, Kariavattom campus, Thiruvananthapuram-695581, Kerala, India.

\*Corresponding Author

**Mob:** +91-9446462933

**Email:** [emailtosony@gmail.com](mailto:emailtosony@gmail.com)

**ORCID** Sony George <https://orcid.org/0000-0002-9848-0465>

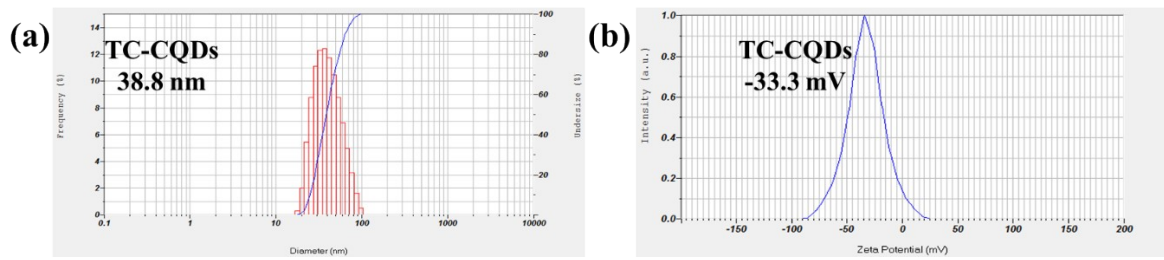

Figure S1. (a) DLS spectrum of TC-CQDs; (b) zeta potential graph of TC-CQDs

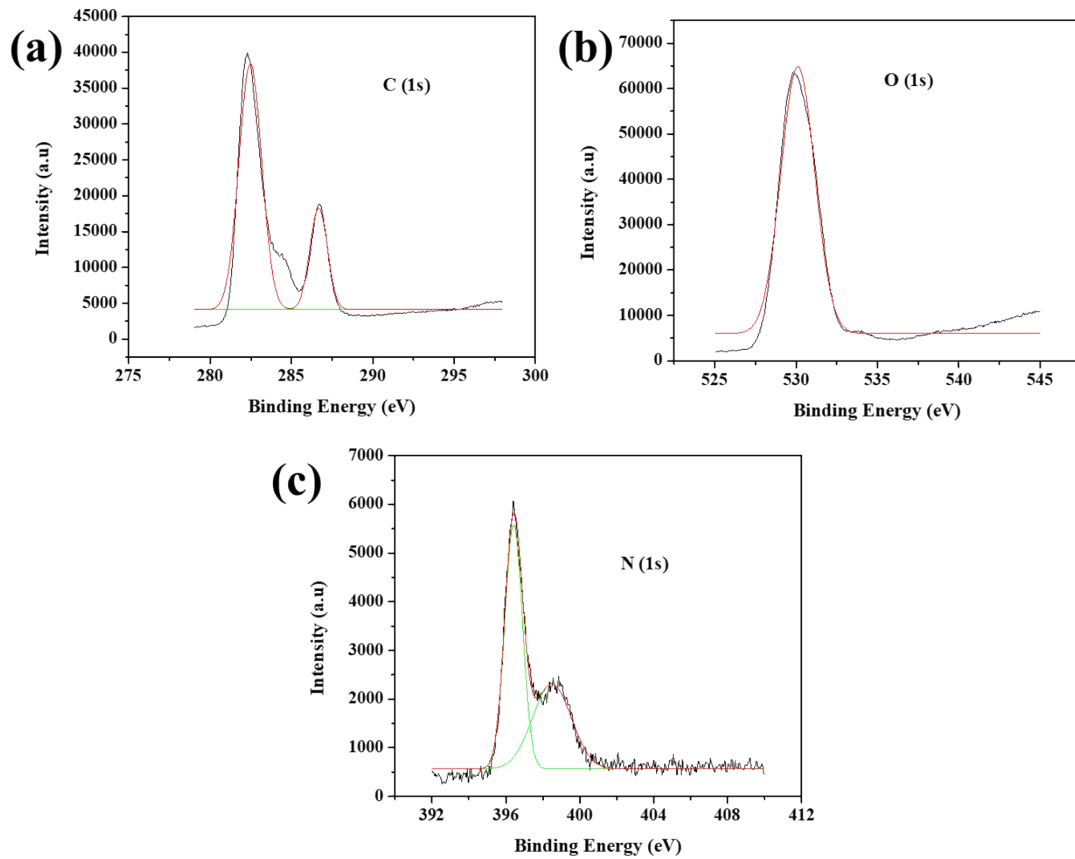

Figure S2. XPS deconvoluted spectra of (a) C (1s); (b) O (1s) and (c) N (1s)

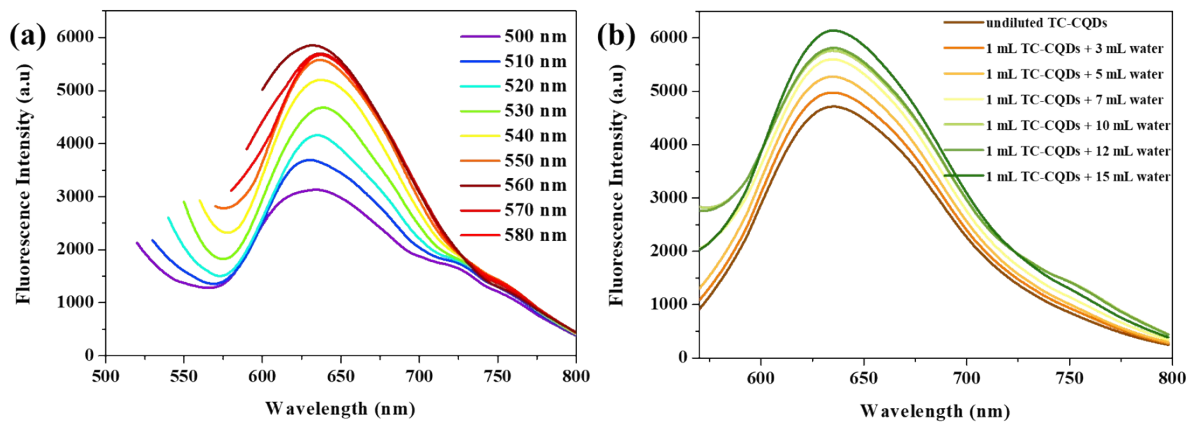

Figure S3. (a) Fluorescence emission spectrum of TC-CQDs at various excitation wavelengths; (b) Fluorescence emission spectrum of TC-CQDs upon dilution

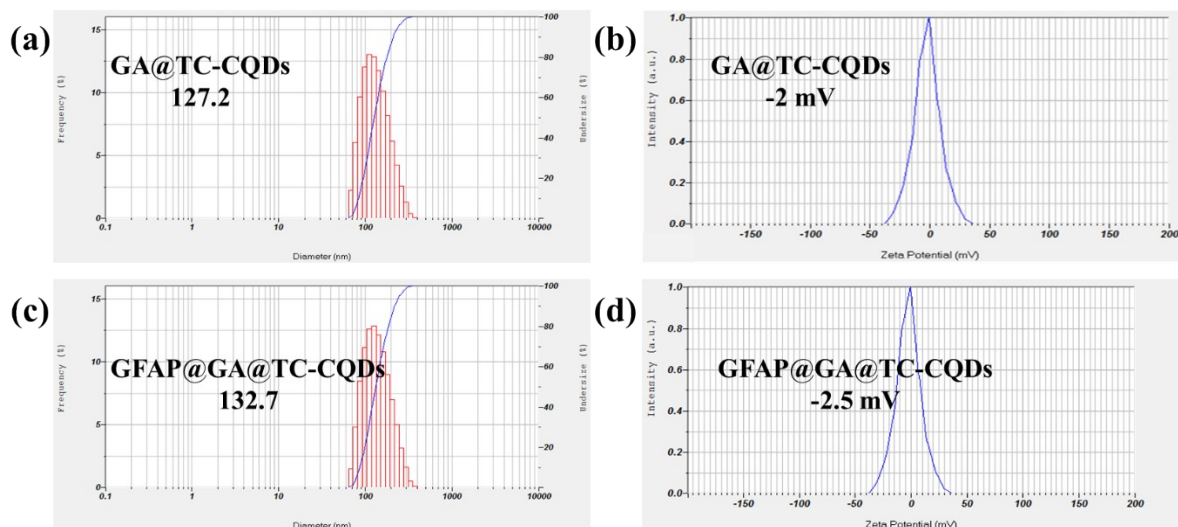

Figure S4. (a) DLS spectrum of GA@TC-CQDs; (b) zeta potential graph of GA@TC-CQDs; (c) DLS spectrum of GFAP@GA@TC-CQDs; (d) zeta potential graph of GFAP@GA@TC-CQDs

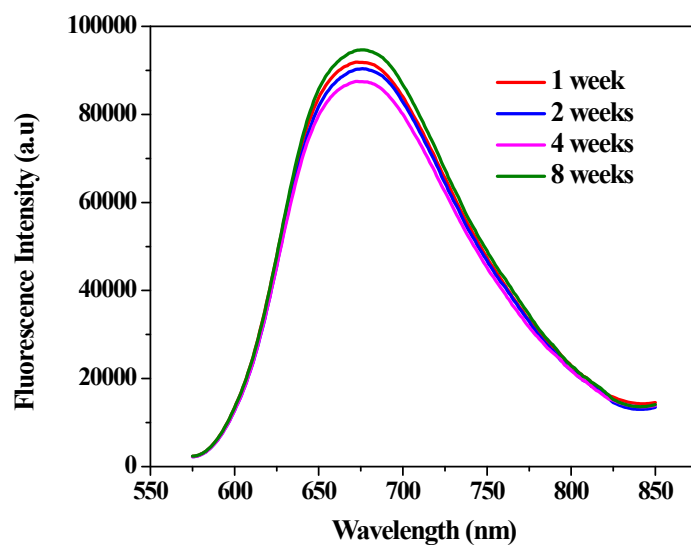

Figure S5. Fluorescence emission spectrum of GA@TC-CQDs after storing at 4°C
